# Supplementary material
Source: Springer Nature journal article supplement (https://www.springermedizin.de/resource/supplementary/10194_2013_288_MOESM1_ESM.pdf/9422618)

Holding on to the  
indispensable medication

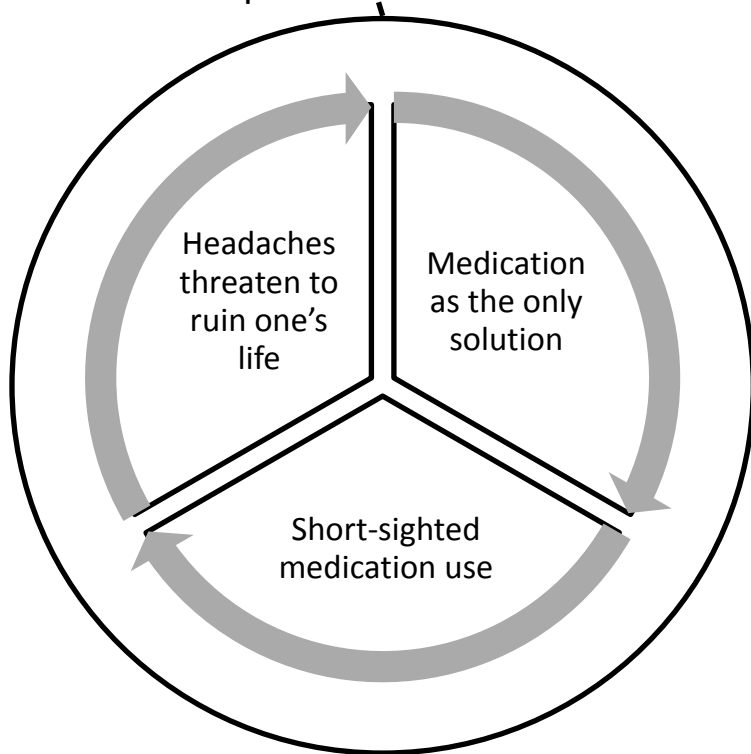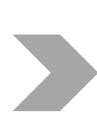

Medication  
overuse  
headache

Supplement: MOESM1 [file 9422618]
